# Supplementary material
Source: PubMed Central journal article supplement (PMC5957071)
Supplement: NIHMS965351-supplement-1A.pdf [file NIHMS965351-supplement-1A.pdf]

## Supplementary material

**Table S1:** The locations of the selected voxels voxels by elastic-net RLR with the highest accuracy in discriminating AD and NC subjects within the brain. Left (13) and right (4) Hippocampus, left (6) and right (12) Temporal Superior gyrus, right Cingulum Posterior (1), left (4) Cuneus, right lyngual gyrus (4), left Fusiform (4), left (4) Postcentral gyrus, 9 Left Parietal Superior, left (2) and right (2) Temporal Superior Pole, left (11) and right (8) Temporal Mid. Lobe, Precentral right(1), left (5) and right (6) Frontal Superior Lobes, left (6) and right (8) Frontal Middle lobe, left (10) and right (2) Inferior Temporal\_Lobe, left (1) and right (2) Temporal Pose Mid. (4) and right (5) Frontal Inferior oper, left (4) and right (4) frontal Inferior Tri., left Frontal Superior Medial Lobe (2), left olfactory lobe (2), left insula (4), left (2) and right (8) Cingulum Mid Lobe, left (4) and right (5) ParaHippocampal Lobe, left (4) and right (12) Amygdala, left (1) and right (4) Calcarine, left and right Parietal Inferior lobe, left (16) and right (8) cerebellum, left (4) and right (1) vermis.

| <b>Ranking</b> | <b>label</b>                           | <b>Region definition</b>                                                                                                                                                                                               | <b>N. voxels</b> |
|----------------|----------------------------------------|------------------------------------------------------------------------------------------------------------------------------------------------------------------------------------------------------------------------|------------------|
| 1              | 37                                     | <i>Hippocampus Left</i>                                                                                                                                                                                                | (13 voxels)      |
| 2              | 42<br>82                               | <i>Amygdala Right</i><br><i>Temporal Superior Right</i>                                                                                                                                                                | (12 voxels)      |
| 3              | 85                                     | <i>Temporal Middle Left</i>                                                                                                                                                                                            | (11 voxels)      |
| 4              | 89                                     | <i>Temporal Inferior Left</i>                                                                                                                                                                                          | (10 voxels)      |
| 5              | 8<br>34<br>86<br>98                    | <i>Frontal_MiddleRight</i><br><i>Cingulum_Middle Right</i><br><i>Temporal_Middle Right</i><br><i>Cerebelum_4_5_Right</i>                                                                                               | (8 voxels)       |
| 6              | 4<br>7<br>81<br>97                     | <i>Frontal Superior Right</i><br><i>Frontal Middle Left</i><br><i>Temporal Superior Left</i><br><i>Cerebelum 4_5 Left</i>                                                                                              | (6 voxels)       |
| 7              | 3<br>12<br>40                          | <i>Frontal Superior Left</i><br><i>Frontal Inferior Oper. Right</i><br><i>ParaHippocampal Right</i>                                                                                                                    | (5 voxels)       |
| 8              | 11<br>13<br>14<br>29<br>38<br>39<br>41 | <i>Frontal Inferior Oper. Left</i><br><i>Frontal Inferior Tri. Left</i><br><i>Frontal Inferior Tri. Right</i><br><i>Insula Left</i><br><i>Hippocampus Right</i><br><i>ParaHippocampal Left</i><br><i>Amygdala Left</i> | (4 voxels)       |

|                                               |                                                                                                                                                                                                      |
|-----------------------------------------------|------------------------------------------------------------------------------------------------------------------------------------------------------------------------------------------------------|
| 44<br>45<br>48<br>55<br>57<br>64<br>68<br>111 | <i>Calcarine Right</i><br><i>Cuneus Left</i><br><i>Lingual Right</i><br><i>Fusiform Left</i><br><i>Postcentral Left</i><br><i>SupraMarginal Right</i><br><i>Precuneus Right</i><br><i>Vermis 4_5</i> |
|-----------------------------------------------|------------------------------------------------------------------------------------------------------------------------------------------------------------------------------------------------------|

## Lists of subjects

Table S2: RID progressive MCI subjects, 164 subjects

|      |      |      |      |      |      |      |
|------|------|------|------|------|------|------|
| 30   | 41   | 42   | 45   | 50   | 54   | 57   |
| 77   | 98   | 101  | 108  | 111  | 126  | 128  |
| 141  | 155  | 161  | 179  | 182  | 187  | 195  |
| 204  | 214  | 217  | 222  | 227  | 231  | 240  |
| 241  | 243  | 249  | 256  | 258  | 269  | 289  |
| 293  | 294  | 314  | 325  | 326  | 331  | 332  |
| 336  | 344  | 362  | 388  | 390  | 394  | 406  |
| 423  | 434  | 442  | 450  | 461  | 476  | 507  |
| 511  | 513  | 518  | 539  | 549  | 563  | 567  |
| 568  | 572  | 604  | 611  | 625  | 631  | 638  |
| 649  | 658  | 667  | 675  | 695  | 697  | 702  |
| 708  | 723  | 725  | 727  | 729  | 750  | 752  |
| 769  | 834  | 835  | 839  | 855  | 856  | 860  |
| 861  | 865  | 869  | 873  | 874  | 878  | 887  |
| 892  | 904  | 906  | 909  | 913  | 915  | 922  |
| 930  | 941  | 947  | 952  | 954  | 973  | 976  |
| 978  | 982  | 987  | 997  | 1004 | 1007 | 1010 |
| 1015 | 1033 | 1043 | 1054 | 1057 | 1066 | 1070 |
| 1073 | 1077 | 1117 | 1121 | 1130 | 1135 | 1138 |
| 1148 | 1213 | 1217 | 1224 | 1240 | 1243 | 1244 |
| 1247 | 1265 | 1271 | 1282 | 1292 | 1295 | 1299 |
| 1311 | 1315 | 1326 | 1331 | 1350 | 1351 | 1363 |
| 1387 | 1389 | 1393 | 1394 | 1398 | 1407 | 1412 |
| 1423 | 1425 | 1427 |      |      |      |      |

Table S3: RID stable MCI subjects, 100 subjects

|     |     |     |     |     |     |     |
|-----|-----|-----|-----|-----|-----|-----|
| 4   | 6   | 33  | 102 | 107 | 116 | 142 |
| 150 | 158 | 169 | 176 | 178 | 200 | 225 |
| 273 | 285 | 290 | 291 | 296 | 307 | 324 |

|      |      |      |      |      |      |      |
|------|------|------|------|------|------|------|
| 351  | 377  | 448  | 449  | 464  | 481  | 501  |
| 505  | 546  | 557  | 607  | 608  | 621  | 626  |
| 634  | 644  | 656  | 673  | 679  | 698  | 709  |
| 715  | 718  | 746  | 770  | 771  | 782  | 792  |
| 800  | 802  | 851  | 867  | 908  | 912  | 914  |
| 919  | 921  | 925  | 950  | 961  | 989  | 1031 |
| 1032 | 1034 | 1040 | 1045 | 1046 | 1052 | 1072 |
| 1074 | 1088 | 1114 | 1118 | 1122 | 1131 | 1140 |
| 1155 | 1182 | 1183 | 1186 | 1187 | 1211 | 1218 |
| 1227 | 1246 | 1260 | 1268 | 1269 | 1284 | 1300 |
| 1314 | 1378 | 1380 | 1384 | 1414 | 1417 | 1418 |
| 1419 | 1421 |      |      |      |      |      |

Table S4: RID unlabeled MCI subjects, 130 subjects

|      |      |      |      |      |      |      |
|------|------|------|------|------|------|------|
| 38   | 44   | 51   | 60   | 78   | 80   | 87   |
| 103  | 112  | 135  | 138  | 160  | 168  | 188  |
| 190  | 205  | 276  | 282  | 284  | 292  | 339  |
| 354  | 361  | 376  | 378  | 384  | 389  | 393  |
| 397  | 407  | 408  | 409  | 410  | 414  | 417  |
| 422  | 424  | 429  | 443  | 445  | 446  | 458  |
| 469  | 485  | 514  | 531  | 544  | 551  | 552  |
| 566  | 579  | 588  | 590  | 598  | 613  | 629  |
| 641  | 668  | 669  | 671  | 721  | 722  | 748  |
| 783  | 821  | 825  | 830  | 832  | 871  | 880  |
| 890  | 917  | 924  | 928  | 932  | 945  | 957  |
| 958  | 994  | 1028 | 1030 | 1038 | 1051 | 1075 |
| 1078 | 1080 | 1092 | 1097 | 1103 | 1104 | 1106 |
| 1116 | 1119 | 1120 | 1149 | 1154 | 1165 | 1168 |
| 1175 | 1188 | 1199 | 1204 | 1210 | 1215 | 1231 |
| 1245 | 1255 | 1275 | 1277 | 1279 | 1293 | 1294 |
| 1309 | 1318 | 1321 | 1322 | 1330 | 1338 | 1340 |
| 1343 | 1346 | 1352 | 1357 | 1366 | 1400 | 1406 |
| 1408 | 1411 | 1420 | 1426 |      |      |      |

Table S5: RID AD subjects used in feature selection task, 200 subjects.

|      |      |      |      |      |      |      |
|------|------|------|------|------|------|------|
| 619  | 816  | 938  | 955  | 1018 | 1059 | 1257 |
| 221  | 814  | 929  | 1341 | 547  | 653  | 316  |
| 1248 | 1304 | 1339 | 1334 | 1354 | 786  | 829  |
| 3    | 10   | 53   | 183  | 689  | 712  | 720  |
| 803  | 592  | 699  | 996  | 1161 | 1205 | 328  |
| 356  | 357  | 1095 | 991  | 1263 | 277  | 286  |
| 335  | 633  | 682  | 213  | 343  | 642  | 753  |
| 1109 | 7    | 129  | 219  | 543  | 83   | 84   |

|      |      |      |      |      |      |      |
|------|------|------|------|------|------|------|
| 93   | 139  | 916  | 1262 | 1289 | 1171 | 1307 |
| 404  | 850  | 1081 | 1082 | 1254 | 1385 | 836  |
| 999  | 1056 | 1184 | 321  | 554  | 773  | 1209 |
| 147  | 400  | 1037 | 1101 | 724  | 733  | 739  |
| 888  | 889  | 1087 | 1281 | 1283 | 1285 | 1308 |
| 341  | 577  | 759  | 760  | 1001 | 627  | 1368 |
| 1391 | 1435 | 1296 | 1044 | 474  | 1371 | 1373 |
| 1379 | 535  | 690  | 730  | 793  | 20   | 29   |
| 76   | 110  | 812  | 828  | 1185 | 1253 | 109  |
| 565  | 1207 | 1079 | 1377 | 1027 | 1090 | 1102 |
| 1164 | 1397 | 1402 | 149  | 884  | 372  | 470  |
| 492  | 1144 | 743  | 747  | 893  | 1062 | 1113 |
| 777  | 1157 | 1192 | 228  | 374  | 979  | 370  |
| 392  | 487  | 1083 | 953  | 88   | 91   | 94   |
| 162  | 606  | 784  | 891  | 1221 | 431  | 754  |
| 844  | 1382 | 167  | 216  | 266  | 310  | 517  |
| 528  | 701  | 740  | 805  | 1409 | 1430 | 956  |
| 1201 | 1290 | 1337 | 457  | 497  | 691  | 1055 |
| 1170 | 194  | 299  | 300  | 426  | 366  | 438  |
| 796  | 841  | 1041 | 340  | 696  | 790  | 852  |
| 853  | 1024 | 1137 | 1152 |      |      |      |

Table S6: RID normal control (NC) subject used in feature selection task, 231 subjects.

|      |      |      |      |      |      |      |
|------|------|------|------|------|------|------|
| 295  | 413  | 559  | 685  | 1261 | 1280 | 907  |
| 931  | 981  | 1021 | 223  | 553  | 602  | 610  |
| 484  | 498  | 681  | 731  | 68   | 70   | 1206 |
| 1222 | 751  | 842  | 862  | 67   | 419  | 420  |
| 472  | 2    | 5    | 8    | 16   | 21   | 22   |
| 23   | 637  | 1009 | 1133 | 1212 | 502  | 575  |
| 1035 | 1276 | 519  | 520  | 548  | 558  | 359  |
| 538  | 43   | 55   | 369  | 425  | 97   | 883  |
| 899  | 1288 | 159  | 337  | 647  | 984  | 14   |
| 66   | 96   | 130  | 31   | 58   | 61   | 81   |
| 926  | 963  | 1190 | 1306 | 985  | 1063 | 74   |
| 118  | 120  | 403  | 824  | 843  | 845  | 866  |
| 618  | 95   | 479  | 677  | 1169 | 516  | 734  |
| 741  | 920  | 923  | 1016 | 1086 | 1098 | 48   |
| 156  | 555  | 576  | 672  | 813  | 1023 | 303  |
| 327  | 454  | 467  | 125  | 262  | 898  | 1002 |
| 1123 | 951  | 1250 | 1251 | 643  | 779  | 818  |
| 934  | 578  | 768  | 1099 | 19   | 24   | 56   |
| 59   | 177  | 257  | 127  | 210  | 1191 | 315  |
| 89   | 311  | 312  | 386  | 304  | 363  | 640  |
| 761  | 1256 | 489  | 526  | 692  | 711  | 1241 |

|      |      |      |      |      |      |      |
|------|------|------|------|------|------|------|
| 1267 | 171  | 172  | 896  | 40   | 90   | 352  |
| 533  | 534  | 15   | 35   | 47   | 69   | 1286 |
| 840  | 876  | 967  | 1013 | 1014 | 166  | 173  |
| 416  | 601  | 360  | 382  | 648  | 657  | 1232 |
| 1249 | 72   | 106  | 113  | 298  | 405  | 506  |
| 605  | 680  | 259  | 260  | 622  | 684  | 229  |
| 230  | 245  | 272  | 500  | 504  | 522  | 545  |
| 863  | 1242 | 778  | 232  | 886  | 969  | 1200 |
| 123  | 319  | 436  | 441  | 1301 | 433  | 488  |
| 493  | 525  | 86   | 184  | 186  | 196  | 283  |
| 301  | 459  | 686  | 972  | 717  | 726  | 767  |
| 810  | 1094 | 1194 | 1195 | 1197 | 1202 | 1203 |

Table S7: The differences in labeling between our data set and the data set used in Cuingnet et al. (2011) for test subjects. The difference in the labeling is due to the fact that Cuingnet et al labeled every MCI subject followed at least 18-months and who had not converted to AD during that time as MCI stable while our labeling of stable MCI (explained in Section 2.1) is more stringent.

| Cuingnet's labeling | Our labeling |      |      |
|---------------------|--------------|------|------|
|                     | sMCI         | pMCI | uMCI |
| sMCI                | 33           | 13   | 21   |
| pMCI                | 0            | 37   | 0    |
| uMCI                | 0            | 0    | 0    |

Table S8: The differences in labeling between our data set and the data set used in Cuingnet et al. (2011) for train subjects.

| Cuingnet's labeling | Our labeling |      |      |
|---------------------|--------------|------|------|
|                     | sMCI         | pMCI | uMCI |
| sMCI                | 26           | 21   | 20   |
| pMCI                | 0            | 37   | 0    |
| uMCI                | 0            | 0    | 0    |
